# Supplementary material for: Identification and Validation of Loci Governing Seed Coat Color by Combining Association Mapping and Bulk Segregation Analysis in Soybean
Source: PubMed Central journal article supplement (PMC4942065; doi:10.1371/journal.pone.0159064), 2016-07-12
Supplement: pone.0159064.s001.pdf [file pone.0159064.s001.pdf]

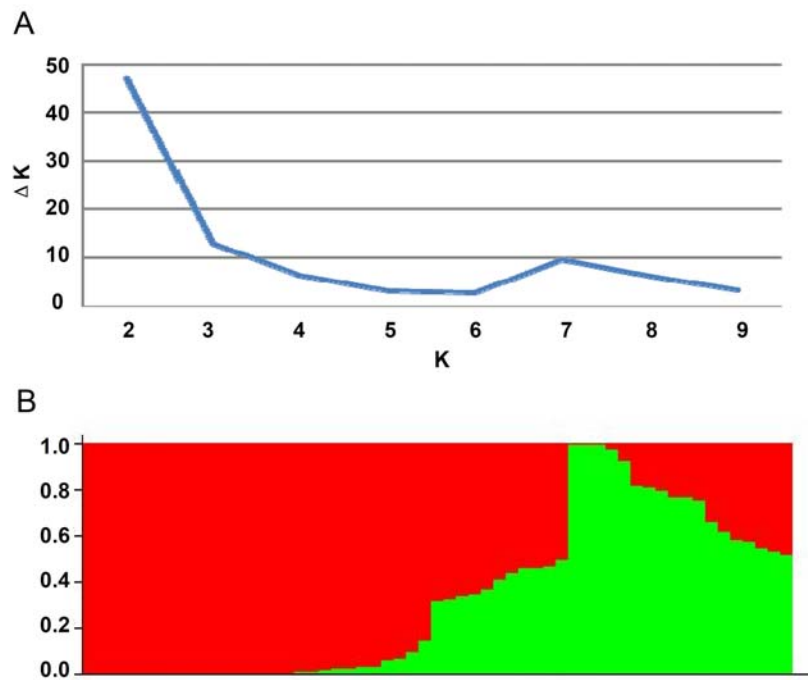

**Figure S1 Population structure of 56 soybean accessions**

(A) Estimated  $\ln$  (probability of the data) calculated for K ranging from 2 to 9. (B) Population structure of soybean accessions, each accession was represented by a single vertical line and every color represented one cluster. The red color indicated Subgroup I and the green color indicated subgroup II.
