# Supplementary material for: Identification and Validation of Loci Governing Seed Coat Color by Combining Association Mapping and Bulk Segregation Analysis in Soybean
Source: PubMed Central journal article supplement (PMC4942065; doi:10.1371/journal.pone.0159064), 2016-07-12
Supplement: pone.0159064.s002.pdf [file pone.0159064.s002.pdf]

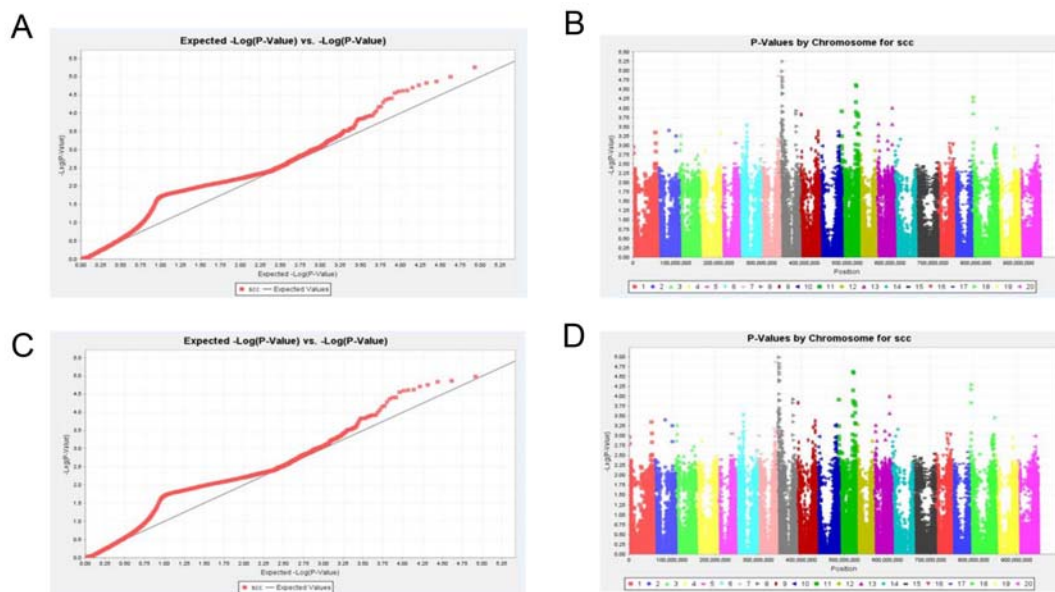

**S2 Fig. Association mapping of seed coat color in soybean with SNPs in Sets B and C.**

(A) Expect  $-\log(P)$  matched observed  $-\log(P)$  best from the QQ-Plot using SNPs from Set B. (B) Manhattan plots showed  $-\log(P)$  from a genome-wide scan were plotted against positions of SNPs on 20 chromosomes using SNPs from Set B. (C) Expect  $-\log(P)$  matched observed  $-\log(P)$  best from the QQ-Plot using SNPs from Set C. (D) Manhattan plots showed  $-\log(P)$  from a genome-wide scan were plotted against positions of SNPs on 20 chromosomes using SNPs from Set C.
