# Supplementary material for: Identification and Validation of Loci Governing Seed Coat Color by Combining Association Mapping and Bulk Segregation Analysis in Soybean
Source: PubMed Central journal article supplement (PMC4942065; doi:10.1371/journal.pone.0159064), 2016-07-12
Supplement: pone.0159064.s004.pdf [file pone.0159064.s004.pdf]

**S1 Table. The general information for accessions used in this study**

| Code Name | Name of Accessions    | Type of Accessions | Seed Coat Color |
|-----------|-----------------------|--------------------|-----------------|
| Ref       | Williams82            | Reference          | Yellow          |
| QRS1      | Hanyuanbalixiaoheidou | Landrace           | Black           |
| QRS2      | Yingdehedou           | Landrace           | Brown           |
| QRS3      | Changshanidou         | Landrace           | Brown           |
| QRS5      | Baiqiu1               | Breeding line      | Yellow          |
| QRS6      | Suinong14             | Breeding line      | Yellow          |
| QRS7      | Suinong20             | Breeding line      | Yellow          |
| QRS8      | Zhongpin03-5373       | Breeding line      | Yellow          |
| QRS9      | Huipizhiheidou        | Landrace           | Black           |
| QRS11     | Zhechengxiaohongdou   | Landrace           | Brown           |
| QRS12     | Pixiansilizao         | Landrace           | Yellow          |
| QRS14     | Xiataizimoshidou      | Landrace           | Brown           |
| QRS15     | Zheng92116            | Breeding line      | Yellow          |
| QRS16     | Zhonghuang13          | Breeding line      | Yellow          |
| QRS20     | Heidou                | Landrace           | Black           |
| QRS21     | ZYD03687              | Wild soybean       | Black           |
| QRS22     | ZYD00401              | Wild soybean       | Black           |
| QRS23     | ZYD04186              | Wild soybean       | Black           |
| QRS24     | ZYD02878              | Wild soybean       | Black           |
| QRS26     | ZYD04734              | Wild soybean       | Black           |
| QRS27     | ZYD04569              | Wild soybean       | Black           |
| QRS28     | ZYD04638              | Wild soybean       | Black           |
| QRS29     | Shang951099           | Breeding line      | Yellow          |
| QRS30     | ZYD02738              | Wild soybean       | Black           |
| QRS31     | Ji-NF58               | Breeding line      | Yellow          |
| QRS32     | Jidou12               | Breeding line      | Yellow          |
| C01       | Wenfeng7              | Breeding line      | Yellow          |
| C02       | Tiefeng8              | Breeding line      | Yellow          |
| C08       | Union                 | Breeding line      | Yellow          |
| C12       | Jindou21              | Breeding line      | Yellow          |
| C14       | Brazil10              | Breeding line      | Yellow          |
| C16       | Tainong1              | Breeding line      | Yellow          |
| C17       | Zigongdongdou         | Landrace           | Yellow          |
| C19       | Jilinxiaoli           | Landrace           | Yellow          |
| C24       | Gandou4               | Breeding line      | Yellow          |
| C27       | Cangdou5              | Breeding line      | Yellow          |
| C30       | Yudou12               | Breeding line      | Yellow          |
| C33       | Hefeng25              | Breeding line      | Yellow          |
| C34       | Gui199                | Landrace           | Yellow          |
| C35       | Guangzhoudali         | Landrace           | Yellow          |
| W01       | Beijing4              | Wild soybean       | Black           |

|     |              |              |       |
|-----|--------------|--------------|-------|
| W02 | Donggou16    | Wild soybean | Black |
| W03 | Wuhai4       | Wild soybean | Black |
| W04 | Yanjin3      | Wild soybean | Brown |
| W05 | Mengjin1     | Wild soybean | Black |
| W06 | Jidong5      | Wild soybean | Black |
| W07 | Fengcheng20  | Wild soybean | Black |
| W08 | Jixian11     | Wild soybean | Black |
| W09 | Kaiyuan21    | Wild soybean | Black |
| W10 | Shuangcheng4 | Wild soybean | Brown |
| W11 | Taiyuan67    | Wild soybean | Brown |
| W12 | Anqing18     | Wild soybean | Black |
| W13 | Yimeng15     | Wild soybean | Black |
| W14 | Yimeng19     | Wild soybean | Black |
| W15 | Yanjin14     | Wild soybean | Brown |
| W16 | Hailun19     | Wild soybean | Black |
| W17 | Zhangwu20    | Wild soybean | Black |

---
