# Supplementary material for: Identification and Validation of Loci Governing Seed Coat Color by Combining Association Mapping and Bulk Segregation Analysis in Soybean
Source: PubMed Central journal article supplement (PMC4942065; doi:10.1371/journal.pone.0159064), 2016-07-12
Supplement: pone.0159064.s005.pdf [file pone.0159064.s005.pdf]

**S2 Table. Comparative analysis of the association mapping results using SNPs from Sets A, B, and C**

| Locus        | Chr. | Physical position<br>(assembly v1.1) | Physical position<br>(assembly v2.0) | Range(kb) | Number of associated<br>SNPs in Set A | Number of associated<br>SNPs in Set B | Number of associated<br>SNPs in Set C |
|--------------|------|--------------------------------------|--------------------------------------|-----------|---------------------------------------|---------------------------------------|---------------------------------------|
| <i>qSC1</i>  | 1    | 51,388,129-52,467,583                | 52,275,421-53,353,044                | 1,079     | 5                                     | 2                                     | 2                                     |
| <i>qSC2</i>  | 6    | 18,878,314-19,047,336                | 19,082,159-19,251,651                | 169       | 7                                     | 5                                     | 4                                     |
| <i>qSC3</i>  | 7    | 41,940,392-43,082,019                | 41,886,767-43,027,411                | 1,142     | 6                                     | 4                                     | 3                                     |
| <i>qSC4</i>  | 8    | 3,417,779-5,512,389                  | 3,420,044-5,519,599                  | 2,095     | 6                                     | 4                                     | 4                                     |
| <i>qSC5</i>  | 8    | 6,783,439-8,648,879                  | 6,789,359-8,678,906                  | 1,865     | 51                                    | 29                                    | 26                                    |
| <i>qSC6</i>  | 8    | 39,473,028-40,585,746                | 40,107,160-41,211,537                | 1,113     | 8                                     | 5                                     | 5                                     |
| <i>qSC7</i>  | 9    | 38,277,760-43,419,283                | 40,878,957-46,624,175                | 5,142     | 5                                     | 5                                     | 5                                     |
| <i>qSC8</i>  | 10   | 42,771,760-43,820,987                | 43,338,444-44,401,056                | 1,049     | 15                                    | 3                                     | 2                                     |
| <i>qSC9</i>  | 11   | 681,423-1,055,084                    | 690,398-1,064,066                    | 374       | 9                                     | 5                                     | 2                                     |
| <i>qSC10</i> | 11   | 38,370,581-38,636,896                | 33,897,357-34,160,486                | 266       | 12                                    | 7                                     | 6                                     |
| <i>qSC11</i> | 12   | 5,404,396-5,649,464                  | 5,412,697-5,660,796                  | 245       | 3                                     | 1                                     | 1                                     |
| <i>qSC12</i> | 13   | 6,661,165-7,743,106                  | 14,111,454-15,225,051                | 1,082     | 9                                     | 4                                     | 3                                     |
| <i>qSC13</i> | 13   | 39,045,030-39,157,835                | 40,223,970-40,336,776                | 113       | 5                                     | 4                                     | 3                                     |
| <i>qSC14</i> | 18   | 57,910,138-57,962,686                | 53,640,208-53,693,058                | 53        | 5                                     | 2                                     | 2                                     |
