# Supplementary material for: Identification and Validation of Loci Governing Seed Coat Color by Combining Association Mapping and Bulk Segregation Analysis in Soybean
Source: PubMed Central journal article supplement (PMC4942065; doi:10.1371/journal.pone.0159064), 2016-07-12
Supplement: pone.0159064.s006.pdf [file pone.0159064.s006.pdf]

**S3 Table. Information of SSR markers near fourteen loci identified by association mapping**

| <b>Maker Name</b> | <b>BARCSOYSSR Sequence ID</b> | <b>Primer</b> | <b>Sequences</b>             | <b>Product size(bp)</b> | <b>Physical Position (assembly v1.1)</b> | <b>Physical Position (assembly v2.0)</b> | <b>Locus</b> |
|-------------------|-------------------------------|---------------|------------------------------|-------------------------|------------------------------------------|------------------------------------------|--------------|
| 1-1536            | Barcsoyssr_1_1536             | Forward       | AATCCAAAATCCTGTCGTGC         | 217                     | 52,438,759                               | 53,323,483                               | <i>qSC1</i>  |
|                   |                               | Reverse       | CATTCACACAAGCTGCAACA         |                         | 52,438,784                               | 53,323,508                               |              |
| 1-1528            | Barcsoyssr_1_1528             | Forward       | TCTTAAGATTTGCCCGTTG          | 270                     | 52,316,259                               | 53,203,363                               | <i>qSC1</i>  |
|                   |                               | Reverse       | GGCTTTTACAAAATATTGAAGTTTGA   |                         | 52,316,312                               | 53,203,416                               |              |
| 1-1544            | Barcsoyssr_1_1544             | Forward       | TTGGATCATGTCAATTTCTTTT       | 239                     | 52,530,918                               | 53,415,809                               | <i>qSC1</i>  |
|                   |                               | Reverse       | AAAAGTTGGACCAAACGGGT         |                         | 52,530,949                               | 53,415,840                               |              |
| 1-1546            | Barcsoyssr_1_1546             | Forward       | ATGCCGCTTCTCATTGAGAT         | 210                     | 52,632,975                               | 53,517,849                               | <i>qSC1</i>  |
|                   |                               | Reverse       | TTGATGATTTAGGTTACGGTGC       |                         | 52,633,016                               | 53,517,890                               |              |
| 6-998             | Barcsoyssr_6_998              | Forward       | TCAAAACAATAATTTTCGAGGAA      | 288                     | 18,713,522                               | -                                        | <i>qSC2</i>  |
|                   |                               | Reverse       | TGTAATTATTTTGAGTCGAAGGAAG    |                         | 18,713,575                               | -                                        |              |
| 6_1032            | Barcsoyssr_6_1032             | Forward       | GGATGAGTTTGATAAACATGAATGA    | 273                     | 19,653,852                               | 19,858,118                               | <i>qSC2</i>  |
|                   |                               | Reverse       | TTATTTGGAGCCCTCCCT           |                         | 19,653,932                               | 19,858,198                               |              |
| Satt557           | Barcsoyssr_6_1041             | Forward       | GCGGGATCCACCATGTAATATGTG     | 207                     | 20,018,845                               | 20,218,992                               | <i>qSC2</i>  |
|                   |                               | Reverse       | GCGCACTAACCCCTTATTGAA        |                         | 20,018,907                               | 20,219,054                               |              |
| Satt308           | Barcsoyssr_7_1556             | Forward       | GCGTTAAGGTTGGCAGGGTGGAAGTG   | 170                     | 42,876,591                               | 42,822,341                               | <i>qSC3</i>  |
|                   |                               | Reverse       | GCGCAGCTTTATACAAAATCAACAA    |                         | 42,876,656                               | 42,822,406                               |              |
| 7-1552            | Barcsoyssr_7_1552             | Forward       | TGTCATCAGGCGTCAGTAA          | 231                     | 42,805,187                               | 42,750,937                               | <i>qSC3</i>  |
|                   |                               | Reverse       | CGTGGAGATCAAAGTTGGGT         |                         | 42,805,237                               | 42,750,987                               |              |
| Sat_276           | Barcsoyssr_7_1561             | Forward       | GCGGAAACCCATCTAGAATATGAAAACA | 272                     | 42,916,026                               | 42,861,774                               | <i>qSC3</i>  |
|                   |                               | Reverse       | GCGTTCTTCTCGAGGTGAGATAACAATC |                         | 42,916,087                               | 42,861,835                               |              |
| 8-248             | Barcsoyssr_8_248              | Forward       | TGTCACCATTTCAATCCTAATCA      | 289                     | 4,726,529                                | 4,732,715                                | <i>qSC4</i>  |
|                   |                               | Reverse       | CTCCCATTCACATCAGCAG          |                         | 4,726,596                                | 4,732,782                                |              |

|         |                    |         |                                 |     |            |            |       |
|---------|--------------------|---------|---------------------------------|-----|------------|------------|-------|
| 8-250   | Barcsoyssr_8_250   | Forward | TGCTGCATTTGGCATTACAT            | 261 | 4,760,029  | 4,766,186  | qSC4  |
|         |                    | Reverse | TCATTTTTCTCACTTTGGTCCC          |     | 4,760,064  | 4,766,221  |       |
| Satt493 | Barcsoyssr_8_262   | Forward | GTTAACGGGAAAAAATTAACCTA         | 251 | 5,027,329  | 5,033,482  | qSC4  |
|         |                    | Reverse | GTGGCTGCCTAGTGCTGTTTTATA        |     | 5,027,364  | 5,033,517  |       |
| 8-459   | Barcsoyssr_8_459   | Forward | CAACTTTCGCATCGGTTACA            | 232 | 8,321,840  | 8,326,164  | qSC5  |
|         |                    | Reverse | CGGAAACTGCTTATGTTTGC            |     | 8,321,883  | 8,326,207  |       |
| 8-466   | Barcsoyssr_8_466   | Forward | TGACATGGCGTGATTGTTCT            | 224 | 8,423,496  | 8,438,244  | qSC5  |
|         |                    | Reverse | ACACATCCAGTCCCAGGAAA            |     | 8,423,563  | 8,438,311  |       |
| 8-475   | Barcsoyssr_8_475   | Forward | TTAAAGAGCCTTACATGACATCTG        | 286 | 8,613,309  | 8,643,336  | qSC5  |
|         |                    | Reverse | CCGTATTCAAATGACTAGCAT           |     | 8,613,368  | 8,643,395  |       |
| Sat-352 | Barcsoyssr_9_1453  | Forward | GCGTATTAGACTAGTGCTATTCGCGAGTTA  | 224 | 41,890,948 | 45,087,036 | qSC7  |
|         |                    | Reverse | GCGTGTCATTTCAATAAAAACAAAAACATAA |     | 41,891,009 | 45,087,097 |       |
| Sat-293 | Barcsoyssr_9_1512  | Forward | GCGTTAGGCAAATGAGATGTCAA         | 281 | 42,848,842 | 46,053,189 | qSC7  |
|         |                    | Reverse | GCGCAGGGCAGTCATCGGAGGTAT        |     | 42,848,903 | 46,053,250 |       |
| Satt196 | Barcsoyssr_9_1541  | Forward | TTGGGAAATAGTGATTGAGGTAAAA       | 189 | 43,310,876 | 46,515,643 | qSC7  |
|         |                    | Reverse | AAATCCCCATTGAATGAGAATAAG        |     | 43,310,941 | 46,515,708 |       |
| Satt592 | Barcsoyssr_10_1339 | Forward | GCGAAGATTGGTCTTTTATGTCAAATG     | 241 | 42,983,859 | 43,509,853 | qSC8  |
|         |                    | Reverse | GCGGAGGAATACAAGTCTCTATTCAA      |     | 42,983,897 | 43,509,891 |       |
| 10-1362 | Barcsoyssr_10_1362 | Forward | CCCCTAAATATAGATCGCCT            | 238 | 43,451,401 | 44,031,058 | qSC8  |
|         |                    | Reverse | GGAACCAACCACACTCTCCA            |     | 43,451,442 | 44,031,099 |       |
| 11-38   | Barcsoyssr_11_38   | Forward | AAGTAACACCCCTCATGTGCAA          | 185 | 788,385    | 797,360    | qSC9  |
|         |                    | Reverse | GTGGTCAAAGCAAGTCGTGA            |     | 788,458    | 797,435    |       |
| 11-46   | Barcsoyssr_11_46   | Forward | CCATCCATTCTTGTGTGGA             | 173 | 1,062,244  | 1,071,226  | qSC9  |
|         |                    | Reverse | GCAATAGCCGTAGGTTTTGG            |     | 1,062,275  | 1,071,257  |       |
| Satt453 | Barcsoyssr_11_1468 | Forward | GCGGAAAAAAACAATAACAACA          | 234 | 38,360,612 | 34,173,223 | qSC10 |
|         |                    | Reverse | TAGTGGGGAAGGGAAGTTACC           |     | 38,360,653 | 34,173,264 |       |

|         |                    |         |                                |     |            |            |              |
|---------|--------------------|---------|--------------------------------|-----|------------|------------|--------------|
| 12-270  | Barcsoyssr_12_270  | Forward | CTCGTGGACTGATAAAGGGC           | 264 | 5,531,936  | 5,542,880  | <i>qSC11</i> |
|         |                    | Reverse | GCTAATTACCCTTTTGTTCAAGG        |     | 5,532,005  | 5,542,949  |              |
| 12-286  | Barcsoyssr_12_286  | Forward | ACGCCACCATCTCTCAAAGT           | 248 | 5,706,951  | 5,718,418  | <i>qSC11</i> |
|         |                    | Reverse | CCCTGCTAGAAACAAGAACCC          |     | 5,707,018  | 5,718,485  |              |
| Satt269 | Barcsoyssr_13_340  | Forward | GCGTGCCAGGTAGAAAAATATTAG       | 253 | 6,580,533  | 15,306,342 | <i>qSC12</i> |
|         |                    | Reverse | GCGGTTTTTCACTTTTCAAATTC        |     | 6,580,565  | 15,306,374 |              |
| 13-368  | Barcsoyssr_13_368  | Forward | TGACCCCATGTGTTCAAATTA          | 222 | 7,178,656  | 14,672,696 | <i>qSC12</i> |
|         |                    | Reverse | AATGTGGATACCAAACATGGA          |     | 7,178,739  | 14,672,779 |              |
| Satt569 | Barcsoyssr_13_458  | Forward | GCGCAAATTGCTTCACGCATCCAAAT     | 184 | 9,567,219  | 12,294,094 | <i>qSC12</i> |
|         |                    | Reverse | GCGGCCTACTATAGTGAAGGGTATA      |     | 9,567,260  | 12,294,135 |              |
| Satt193 | Barcsoyssr_13_477  | Forward | GCGTTTCGATAAAAATGTTACACCTC     | 239 | 10,032,901 | 11,847,952 | <i>qSC12</i> |
|         |                    | Reverse | TGTTTCGATTATTGATCAAAAAT        |     | 10,032,969 | 11,848,020 |              |
| Satt472 | Barcsoyssr_18_1708 | Forward | GCGAATACATAAAACTCAAATCAAATCATA | 279 | 58,136,231 | 53,866,606 | <i>qSC14</i> |
|         |                    | Reverse | GCGTTCATAAATTCATTCATAGTTTCAAT  |     | 58,136,341 | 53,866,716 |              |
